# Supplementary material for: Different Stages of Quiescence, Senescence, and Cell Stress Identified by Molecular Algorithm Based on the Expression of Ki67, RPS6, and Beta-Galactosidase Activity
Source: MDPI journal article supplement (doi:10.3390/ijms22063102), 2021-03-18
Supplement: s1 [file s1]

|                        | AP        | SEN1     | SEN2      | SEN3      | SEN4     | SEN5     |
|------------------------|-----------|----------|-----------|-----------|----------|----------|
| <b>Senescent cells</b> | 6.8±0.9   | 27.1±3.5 | 18.5±2.4  | 15.5±2.32 | 20.1±2.4 | 28.2±3.6 |
| <b>G0/G1</b>           | 70.7±12.1 | 81.3±8.9 | 78.3±13.3 | 82.1±13.9 | 54.8±7.1 | 55.5±6.6 |
| <b>S</b>               | 14.41±0.4 | 8.4±0.5  | 6.5±0.8   | 4.8±0.7   | 6.0±0.9  | 5.57±0.8 |
| <b>G2/M</b>            | 14.8±2.1  | 10.2±1.8 | 15.0±1.8  | 13.0±1.8  | 39.1±6.6 | 38.8±6.6 |
| <b>Apoptotic cells</b> | 3.0±0.4   | 5.6±0.7  | 2.3±0.5   | 6.7±0.8   | 5.2±0.3  | 7.1±0.7  |

#### **Supplemental file 5 – Treatment of human dermal fibroblasts with H<sub>2</sub>O<sub>2</sub>**

Human BJ-5ta dermal fibroblasts (HDF) from ATCC Italy (code CRL-4001) were grown in DMEM low glucose with 10% FBS. HDF cultures (70% confluent) were incubated with 300µM hydrogen peroxide (H<sub>2</sub>O<sub>2</sub>) (Sigma-Aldrich MO, USA) for 0.5 hour. Following this treatment, cells were further cultivated for 64 hours. Cell samples were collected at 0.5, 1, 24, 48, and 64 hours post-H<sub>2</sub>O<sub>2</sub> treatment for other biological assays.

The term AP stands for active proliferating cells. The terms SENs refer to incubation time after H<sub>2</sub>O<sub>2</sub> treatment: SEN1 (0.5 hours), SEN2 (1 hour), SEN3 (24 hours), SEN4 (48 hours), SEN5 (64 hours).

In the table are reported the percentage of senescent cells detected by determining SA-β-gal activity. The cell cycle was evaluated with as reported in Methods. The apoptosis was detected as described in supplemental file 4.
