# Supplementary material for: Different Stages of Quiescence, Senescence, and Cell Stress Identified by Molecular Algorithm Based on the Expression of Ki67, RPS6, and Beta-Galactosidase Activity
Source: Int J Mol Sci. 2021 Mar 18;22(6):3102. doi: 10.3390/ijms22063102 (PMC8002939; doi:10.3390/ijms22063102)
Supplement: Supplementary file 1 [file ijms-22-03102-s001.zip]

Archive with 10 entries (10 files):
- Supp File 1.tif
- __MACOSX/._Supp File 1.tif
- Supp File 2.tif
- __MACOSX/._Supp File 2.tif
- Supp File 3.tif
- __MACOSX/._Supp File 3.tif
- Supp File 4.tif
- __MACOSX/._Supp File 4.tif
- Suppl File 5.pdf
- __MACOSX/._Suppl File 5.pdf
